# Supplementary material for: Rice Bran Feruloylated Oligosaccharides Activate Dendritic Cells via Toll-Like Receptor 2 and 4 Signaling
Source: MDPI journal article supplement (doi:10.3390/molecules19045325), 2014-04-23

## Supplemental Materials

**Figure S1.** The stimulatory activity of FOs on BMDCs is not due to contamination. Immature BMDCs, which were pre-incubated alone or in the presence of PMB (100  $\mu\text{g/mL}$ ) for 2 h at 37  $^{\circ}\text{C}$ , were stimulated with Fos (50  $\text{g/mL}$ ) or LPS (100  $\text{ng/mL}$ ) for 24 h. (A) Supernatants were collected, and mouse IL-6 and IL-12 production were measured by ELISA. (B) The expression of the surface marker CD80 was analyzed by flow cytometry with a fluorescently labeled Ab. The gray-filled area represents staining with specific primary antibody. The red-line represents PMB treated group. The open histogram represents staining with isotype control group. Data were shown as the mean fluorescence intensity (MFI). The histogram shows data from one representative experiment of each group. (C) The bar graphs represent the mean  $\pm$  SD from triplicate well measurements from one of three independent experiments with similar results. \*\*\*  $p < 0.001$ ; versus FOs or LPS treated alone DCs group.

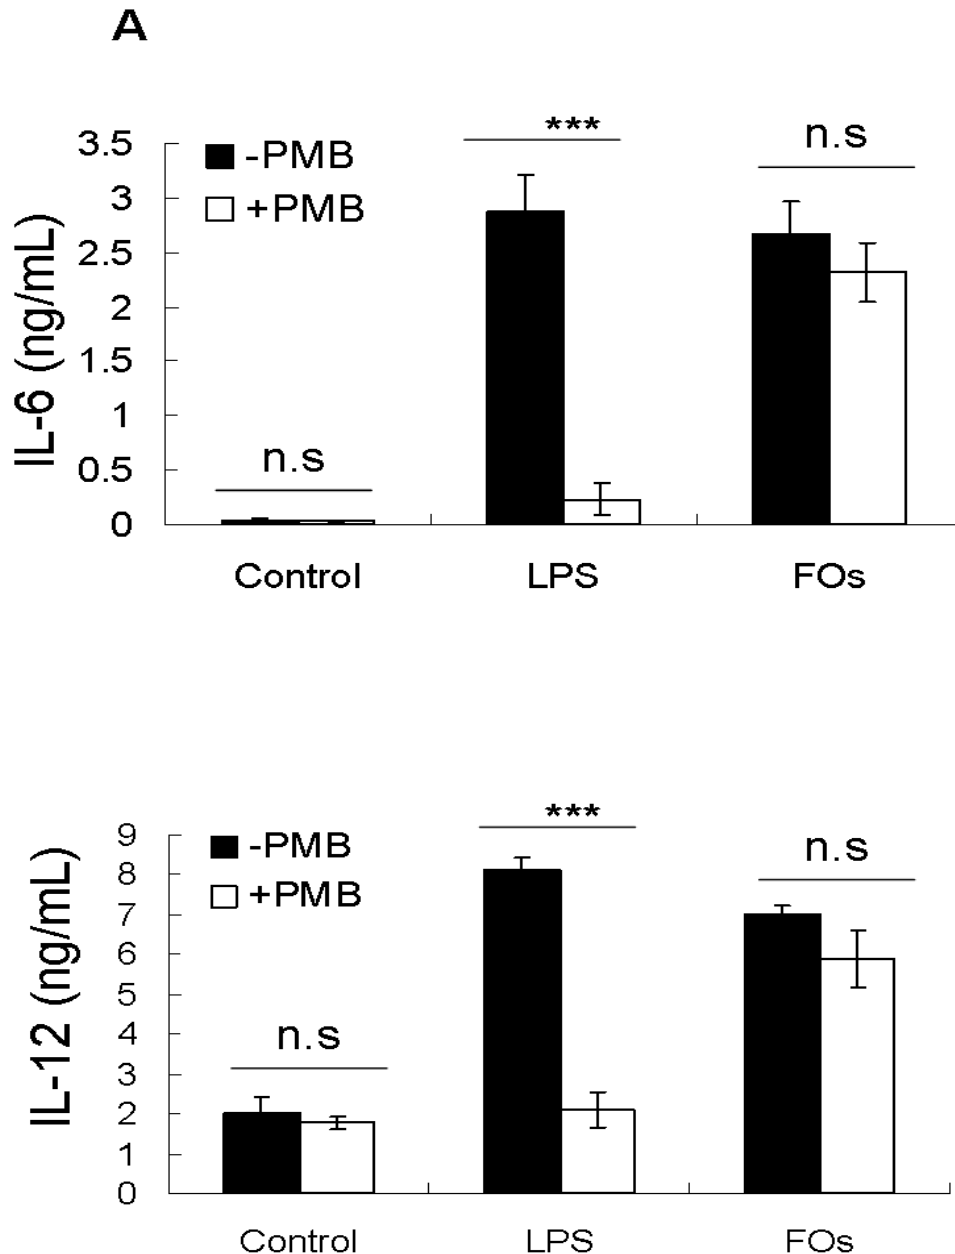

Figure S1. Cont.

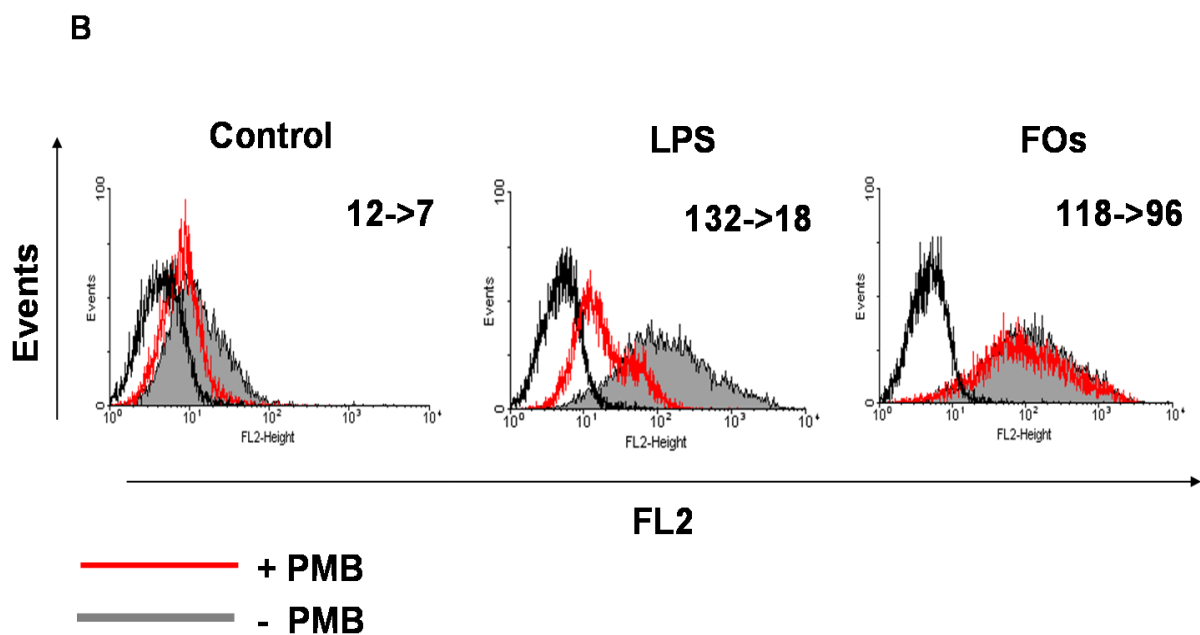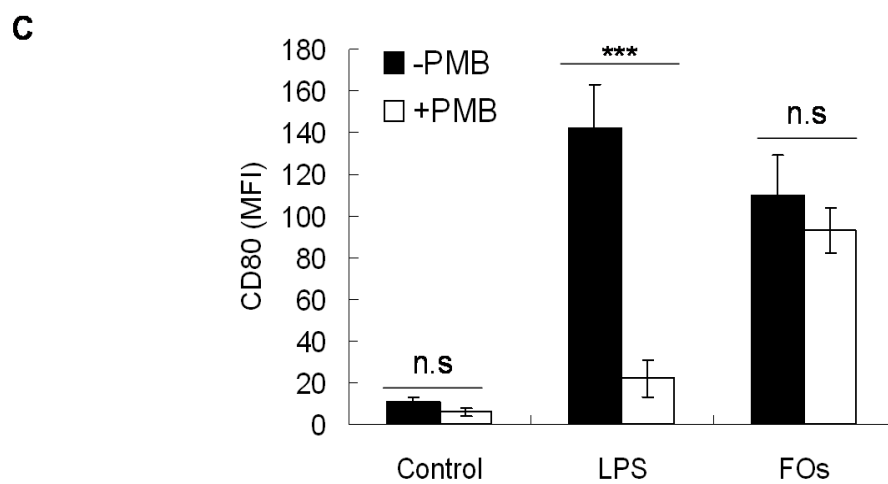

Supplement: s1 [file s1]
